# Supplementary material for: Detecting eczema areas in digital images: an impossible task?
Source: bioRxiv or medRxiv preprint supplement (doi:10.1101/2022.03.03.22271780), 2022-03-08
Supplement: Supplementary file [file media-1.pdf]

## SUPPLEMENTARY FIGURES

### Detecting eczema areas in digital images: an impossible task?

Guillem Hurault<sup>1</sup>, Kevin Pan<sup>1</sup>, Ricardo Mokhtari<sup>1</sup>,  
Bayanne Olabi<sup>2</sup>, Eleanor Earp<sup>3</sup>, Lloyd Steele<sup>4</sup>, Hywel C. Williams<sup>2</sup>, Reiko J. Tanaka<sup>1</sup>

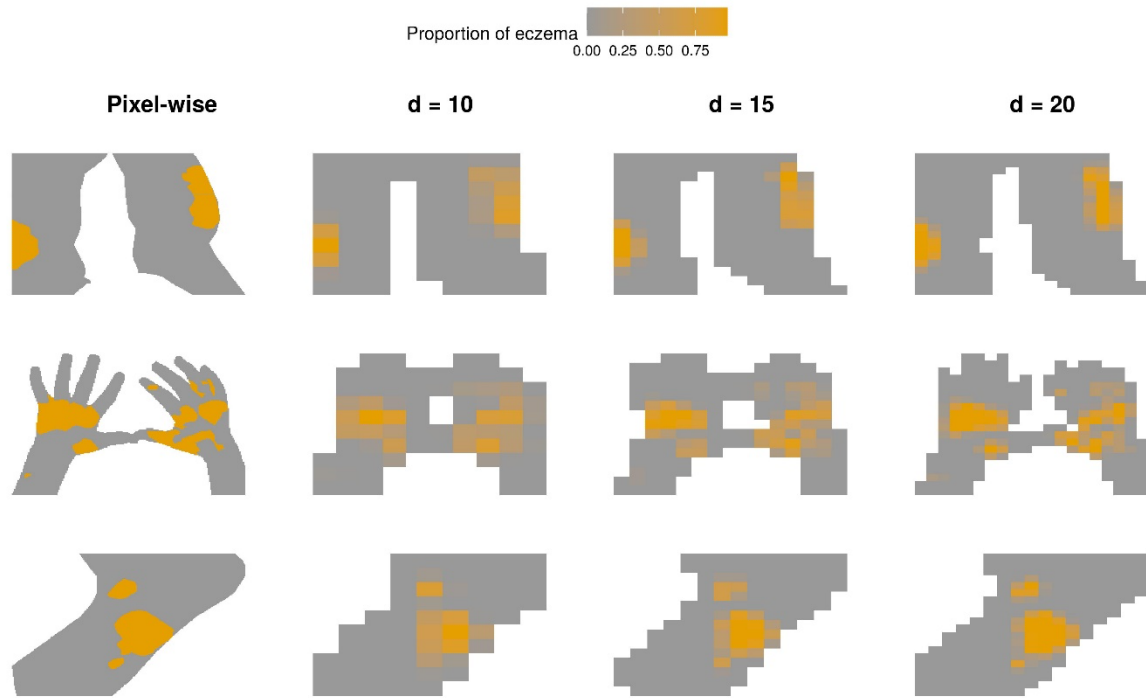

**Figure S1:** Illustration of area-level segmentation compared to pixel-level segmentation, for the same images as in Figure 1, for the segmentation for rater 1. Rows correspond to images and columns to pixel- and area-level segmentation for different image resolutions ( $d$ ).

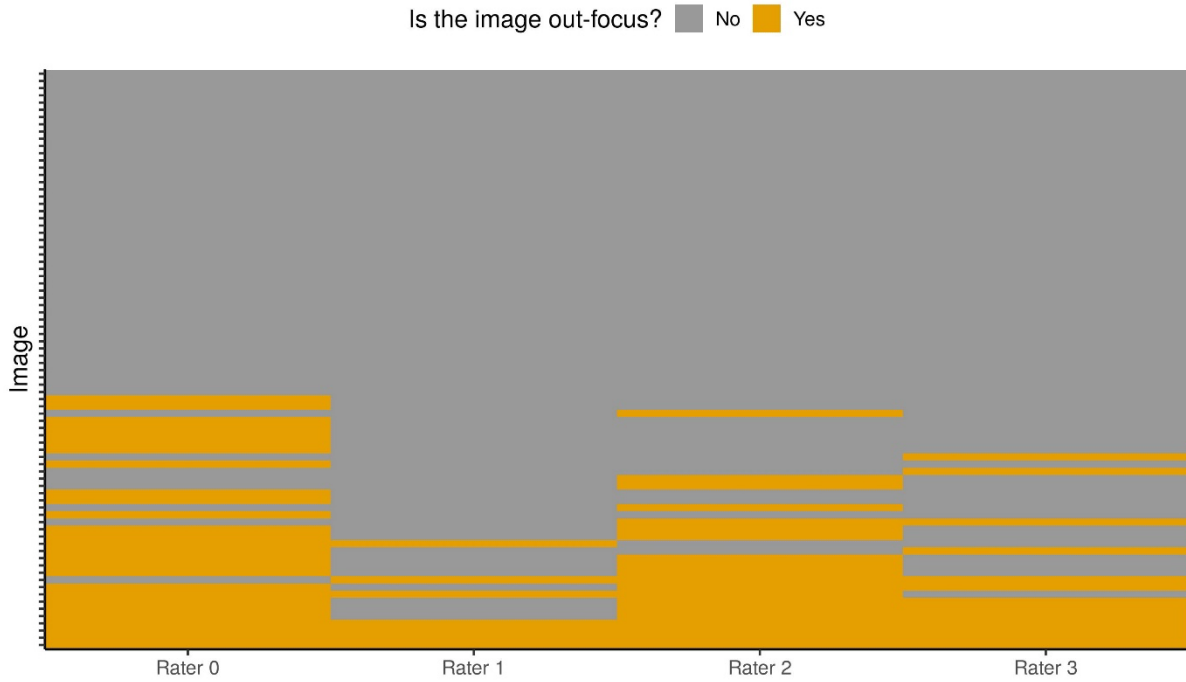

**Figure S2:** Distribution of out-of-focus assessments by the four raters (x-axis) for each image (y-axis). The orange represents that the rater deemed the image out-of-focus. 17 images were deemed out-of-focus by only one rater, 8 images by two raters, 6 images by three raters and 4 images by all the four raters.

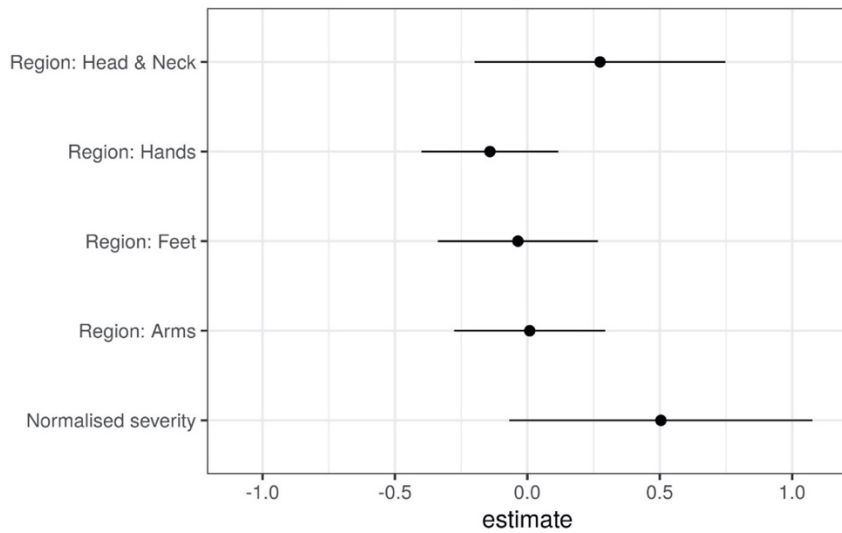

**Figure S3:** Estimated coefficients (and 95% CI) for variables in a linear model that predicts the mean image quality score across raters. The coefficients for the regions quantify the difference in the intercept from that of the default region (legs).

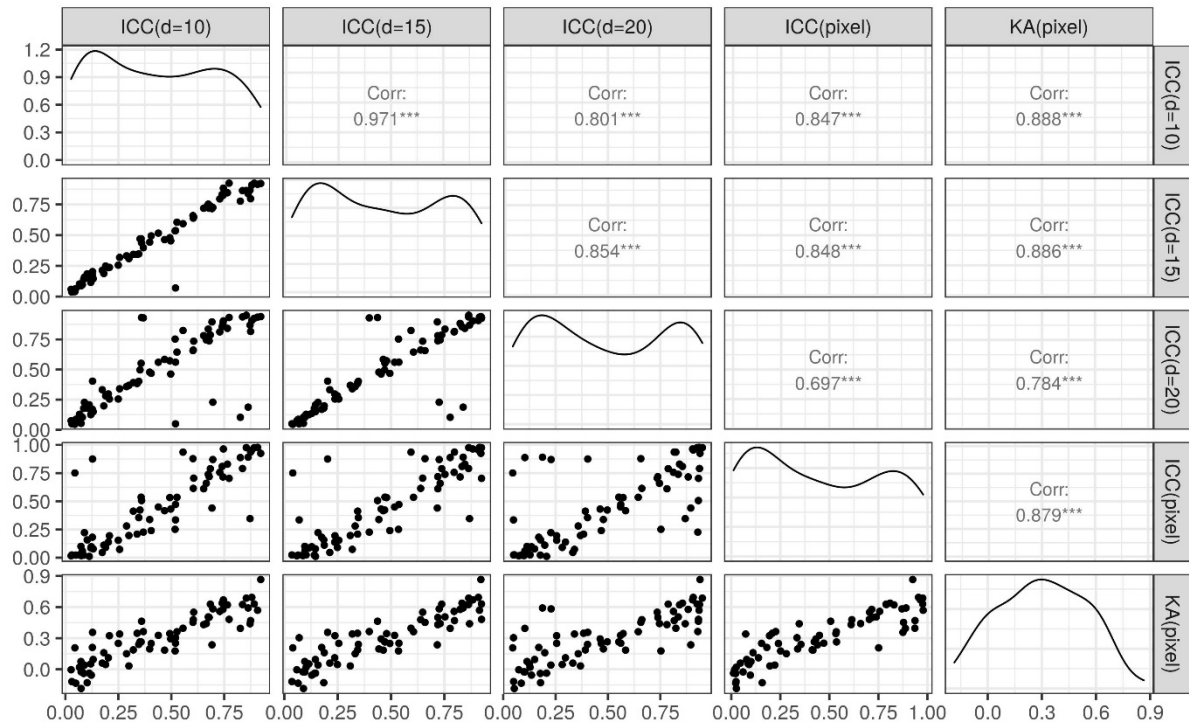

**Figure S4:** Comparison between the IRR metrics considered in this study (scatter plots, density plots and Pearson correlations).

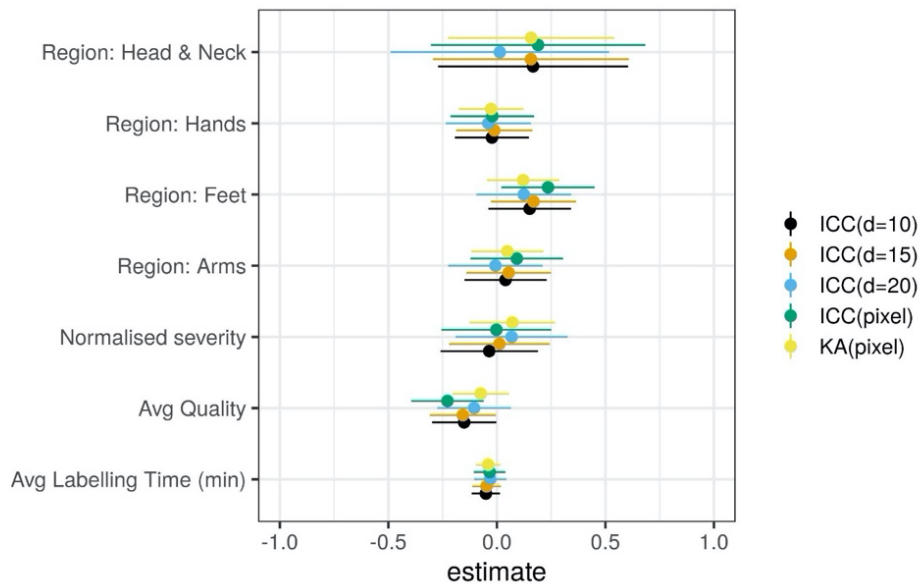

**Figure S5:** Estimated coefficients (and 95% CI) for the variables in a linear model that predicts IRR metrics. The variables were normalised to a sensible scale for a fair interpretation of the effect sizes. The coefficients for the regions quantify the difference in intercept from that of the default region (legs).

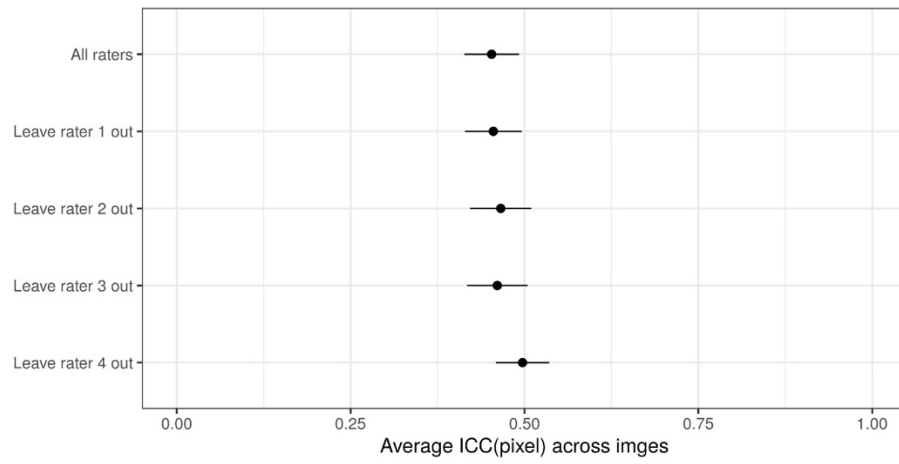

**Figure S6:** Leave-one-rater out sensitivity analysis of the average pixel-level ICC measure.
